# Supplementary material for: On the relationship between emotions and cognitive control: Evidence from an observational study on emotional priming Stroop task
Source: PubMed Central journal article supplement (PMC10681184; doi:10.1371/journal.pone.0294957), 2023-11-27
Supplement: pone.0294957.s002.pdf [file pone.0294957.s002.pdf]

**S1 APPENDIX. List of images used from the NimStim set of facial expressions.**

01F\_NE\_C, 01F\_SA\_C, 03F\_NE\_O, 03F\_SA\_O, 07F\_NE\_C, 07F\_SA\_C, 09F\_NE\_C, 09F\_SA\_C, 10F\_NE\_O, 10F\_SA\_O, 13F\_NE\_O, 13F\_SA\_O, 14F\_NE\_O, 14F\_SA\_O, 17F\_NE\_C, 17F\_SA\_C, 18F\_NE\_C, 18F\_SA\_C, 19F\_NE\_C, 19F\_SA\_C, 20M\_NE\_C, 20M\_SA\_C, 26M\_NE\_C, 26M\_SA\_C, 27M\_NE\_C, 27M\_SA\_C, 29M\_NE\_C, 29M\_SA\_C, 30M\_NE\_C, 30M\_SA\_C, 34M\_NE\_C, 34M\_SA\_C, 39M\_NE\_C, 39M\_SA\_C, 40M\_NE\_C, 40M\_SA\_C, 43M\_NE\_C, 43M\_SA\_C, 45M\_NE\_O, and 45M\_SA\_O).
