# Supplementary material for: On the relationship between emotions and cognitive control: Evidence from an observational study on emotional priming Stroop task
Source: PubMed Central journal article supplement (PMC10681184; doi:10.1371/journal.pone.0294957), 2023-11-27
Supplement: pone.0294957.s003.pdf [file pone.0294957.s003.pdf]

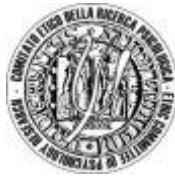

**COMITATO ETICO DELLA RICERCA PSICOLOGICA (AREA 17)**  
**Dipartimenti/Sezione di Psicologia - Università di Padova**  
**Via Venezia 8, 35131, Padova**

FAX. +39-0498276600, Email: [comitato.etico.area17@unipd.it](mailto:comitato.etico.area17@unipd.it); Sito WEB: <http://ethos.psy.unipd.it/>

**Protocollo:** 4187

**Data:** 10/05/2021

**Numero Univoco:** 71AA5B3AAE967C5273D2933B23889286

**Scopo:** Richiesta di parere

**Titolo:** Controllo cognitivo e emozione in un compito di Stroop

**Proponente**

**Cognome e nome:** Ambrosini Ettore

**Ruolo:** Associato

**e-mail:** etto.ambrosini@unipd.it

**Area:** Psicologia generale

**(se altro):**

**Ricercatori partecipanti:** 5

Ambrosini Ettore - Associato - DPG e DNS Vallesi Antonino - Associato - DNS Visalli Antonino - Assegnista - DNS Sambataro Fabio - Associato - DNS Tenconi Elena - Associato - DNS

**Il Comitato Etico, dopo attento esame delle informazioni fornite dal proponente, esprime parere positivo riguardante gli aspetti etici del progetto.**

**The project has been approved by the Ethical Committee for the Psychological Research of the University of Padova.**

Si fa presente che tale approvazione è vincolata al rispetto della normativa vigente in materia di privacy. Le vigenti leggi sulla protezione dei dati (D. Lgs 196/2003 e UE GDPR 679/2016) sono valide solo per partecipanti UE

Please note that this approval is subject to compliance with current privacy legislation. The current data protection laws (D. Lgs 196/2003 and EU GDPR 679/2016) are valid only for EU participants

**Il Comitato Etico si riserva di revocare l'approvazione qualora il progetto non venisse condotto secondo quanto dichiarato nel protocollo di ricerca approvato dal Comitato.**

**Pertanto, modifiche in qualsiasi punto della procedura o del consenso informato dovranno essere sottoposte nuovamente all'attenzione del Comitato.**

Padova, 22/05/2021

Per il Comitato Etico dell'area 17

La Presidente

Il Vicepresidente

Il Segretario

I membri
