# Supplementary material for: On the relationship between emotions and cognitive control: Evidence from an observational study on emotional priming Stroop task
Source: PubMed Central journal article supplement (PMC10681184; doi:10.1371/journal.pone.0294957), 2023-11-27
Supplement: pone.0294957.s004.pdf [file pone.0294957.s004.pdf]

**Ethics committee of the psychological research (Area 17)  
Psychology Departments/Section – Università di Padova Via Venezia  
8, 35131, Padova FAX. +39-0498276600, Email:  
comitato.etico.area17@unipd.it; Sito WEB: <http://ethos.psy.unipd.it/>**

English translation of the Ethics Committee Approval for the project entitled:  
**Controllo cognitivo e emozione in un compito di Stroop** (in English: Cognitive  
Control and emotion in a Stroop task)

**Protocol: 4187**

**Date:** 10/05/2021

**Univocal Number:** 71AA5B3AAE967C5273D2933B23889286

**Goal:** Request of evaluation

**Title:** Cognitive Control and emotion in a Stroop task

Proponent

Surname & Name: Ambrosini Ettore

Role: Associate Professor

e-mail: [ettore.ambrosini@unipd.it](mailto:ettore.ambrosini@unipd.it)

**Area:** General Psychology

**Participant researchers:** 5

Ambrosini Ettore – Associate prof. - DPG & DNS Vallesi Antonino – Associate prof. -  
DNS Visalli Antonino – post-doc - DNS Sambataro Fabio – Associate prof. - DNS  
Tenconi Elena – Associate prof. – DNS

**The Ethics committee, after careful evaluation of the information provided by  
the proponent, expresses a positive opinion regarding the ethics aspects of  
the project.**

**The project has been approved by the Ethical Committee for the Psychological  
Research of the University of Padova.**

**Please note that this approval is subject to compliance with current privacy  
legislation. The current data protection laws (D. Lgs 196/2003 and EU GDPR  
679/2016) are valid only for EU participants.**

**The Ethics committee could revoke the approval if the project would not be  
carried out according to what has been declared in the research protocol  
approved by the committee.**

**For this, modifications of any point of the procedure or of the informed  
consent will have to be submitted again to the attention of the Committee.**
